# Supplementary material for: Berry Anthocyanin, Acid, and Volatile Trait Analyses in a Grapevine-Interspecific F2 Population Using an Integrated GBS and rhAmpSeq Genetic Map
Source: MDPI journal article supplement (doi:10.3390/plants11050696), 2022-03-04
Supplement: s1 [file s1]

**Table S1.** VRS-F<sub>2</sub> GBS-rhAmpseq genetic map coverage relative to *V. vinifera* PN40024 12X V2 reference genome.

| Chromosome | Start (bp) | end (bp) | Physical length (Mb) | PN40024 genome end (Mb) | Percent coverage compared to PN40024 genome |
|------------|------------|----------|----------------------|-------------------------|---------------------------------------------|
| 1          | 61203      | 23733091 | 23.67                | 24.23                   | 97.7                                        |
| 2          | 99075      | 18702116 | 18.60                | 18.89                   | 98.5                                        |
| 3          | 41401      | 19365074 | 19.32                | 20.70                   | 93.4                                        |
| 4          | 130509     | 24606920 | 24.48                | 24.71                   | 99.0                                        |
| 5          | 58210      | 25494850 | 25.44                | 25.65                   | 99.2                                        |
| 6          | 226426     | 22260083 | 22.03                | 22.65                   | 97.3                                        |
| 7          | 91133      | 27018992 | 26.93                | 27.36                   | 98.4                                        |
| 8          | 30944      | 22458922 | 22.43                | 22.55                   | 99.5                                        |
| 9          | 226145     | 22885244 | 22.66                | 23.01                   | 98.5                                        |
| 10         | 34103      | 22647176 | 22.61                | 23.50                   | 96.2                                        |
| 11         | 255751     | 20115217 | 19.86                | 20.12                   | 98.7                                        |
| 12         | 173874     | 24257004 | 24.08                | 24.27                   | 99.2                                        |
| 13         | 162233     | 29053865 | 28.89                | 29.08                   | 99.4                                        |
| 14         | 88562      | 30108258 | 30.02                | 30.27                   | 99.2                                        |
| 15         | 177997     | 12655885 | 12.48                | 20.30                   | 61.5                                        |
| 16         | 3648       | 23550532 | 23.55                | 23.57                   | 99.9                                        |
| 17         | 217227     | 18015932 | 17.80                | 18.69                   | 95.2                                        |
| 18         | 227536     | 34381037 | 34.15                | 34.57                   | 98.8                                        |
| 19         | 5269       | 24632229 | 24.63                | 24.70                   | 99.7                                        |

bp, basepairs; Physical length (Mb) is chromosome length of 12X V2 *V. vinifera* 'PN40024' reference genome covered by this map. Coverage is calculated as the physical length presented for this linkage map divided by the total physical length of the chromosome in *V. vinifera* 'PN40024' 12X V2 genome.

**Table S2.** Predicted pistillate (ff), homozygous hermaphrodite (HH) and heterozygous hermaphrodite (Hf) flower phenotype for VRS-F<sub>2</sub> subset using linked markers.

| Phenotype | rh_2_4497054 | GBS_2_4567885 | rh_2_4599939 | GBS_2_4650201 | rh_2_4703733 | rh_2_4825658 | GBS_2_5352479 |
|-----------|--------------|---------------|--------------|---------------|--------------|--------------|---------------|
| Ff        | 91           | 89            | 89           | 88            | 90           | 92           | 90            |
| HH        | 97           | 96            | 96           | 96            | 94           | 91           | 88            |
| Hf        | 170          | 173           | 173          | 174           | 174          | 175          | 180           |

**Table S3.** Descriptive trait data for grandparents, parent, and VRS-F<sub>2</sub> population.

| Trait                      | Year | Grandparent/ parent line              |                   |                          | VRS-F <sub>2</sub> population |       |         |
|----------------------------|------|---------------------------------------|-------------------|--------------------------|-------------------------------|-------|---------|
|                            |      | <i>Vitis riparia</i><br>'Manitoba 37' | 'Seyval<br>blanc' | F <sub>1</sub><br>16_9_2 | Mean                          | Min   | Max     |
| Total anthocyanin (mg/L)   | 2013 | 10799.8                               | 0                 | 264.0                    | 3531.3                        | 598.2 | 11186.8 |
|                            | 2018 | Nd                                    | nd                | Nd                       | 1020.6                        | 49.6  | 2908.0  |
| Total monoglucoside (mg/L) | 2013 | 2624.8                                | 0                 | 964.9                    | 1364.4                        | 386.0 | 2886.2  |
|                            | 2018 | Nd                                    | nd                | Nd                       | 319.7                         | 29.4  | 851.4   |
| Total diglucoside (mg/L)   | 2013 | 8120.8                                | 0                 | 1658.4                   | 2027.3                        | 22.5  | 8344.1  |
|                            | 2018 | Nd                                    | nd                | Nd                       | 681.8                         | 20.2  | 2187.8  |
| Malic acid (g/L)           | 2013 | 14.7                                  | nd                | 9.6                      | 10.7                          | 3.4   | 19.0    |
|                            | 2016 | 29.0                                  | nd                | 12.6                     | 12.0                          | 4.1   | 23.4    |
|                            | 2018 | 12.8                                  | nd                | 7.6                      | 10.6                          | 1.5   | 28.3    |
| Titratable acidity (g/L)   | 2013 | 28.3                                  | nd                | 21.1                     | 22.5                          | 14.8  | 35.8    |
|                            | 2016 | 26.0                                  | nd                | 13.3                     | 13.3                          | 7.2   | 26.2    |
|                            | 2018 | 20.1                                  | nd                | 14.8                     | 12.9                          | 6.0   | 24.0    |
| (E)-2-hexenal (ppb)        | 2013 | 348.4                                 | nd                | 225.8                    | 406.8                         | 60.5  | 1264.3  |
|                            | 2018 | 66.2                                  | 220.4             | 149.8                    | 68.8                          | 0.8   | 216.6   |
| Hexanal (ppb)              | 2013 | 362.1                                 | nd                | 205.0                    | 318.3                         | 82.8  | 825.5   |
|                            | 2018 | 1300.1                                | 1370.5            | 714.8                    | 925.6                         | 354.6 | 2584.0  |
| IPMP (ppb)                 | 2013 | 21.6                                  | nd                | 0                        | 20.0                          | 0.0   | 238.9   |
|                            | 2018 | 170.6                                 | 141.6             | 161.7                    | 135.3                         | 1.1   | 448.6   |
| IBMP (ppb)                 | 2013 | 39.6                                  | nd                | 0                        | 12.7                          | 0.0   | 206.4   |

Sample size 2013 (63) 2016 (69), 2018 (64); Min, minimum; Max, maximum; nd, data not available ('Seyval blanc' is subject to winter bud injury); mg, milligrams; L, liters; ppb, parts per billion

**Table S4.** Pearson correlation coefficient for malic acid and titratable acidity (TA) trait pairs.

| Trait           | TA 2013 | TA 2016 | TA 2018 | Malic acid 2013 | Malic acid 2016 | Malic acid 2018 |
|-----------------|---------|---------|---------|-----------------|-----------------|-----------------|
| TA 2013         | 1.00    | 0.82*   | 0.82*   | 0.96*           | 0.84*           | 0.52*           |
| TA 2016         | 0.82*   | 1.00    | 0.89*   | 0.78*           | 0.91*           | 0.62*           |
| TA 2018         | 0.82*   | 0.89*   | 1.00    | 0.78*           | 0.90*           | 0.71*           |
| Malic acid 2013 | 0.96*   | 0.78*   | 0.78*   | 1.00            | 0.83*           | 0.55*           |
| Malic acid 2016 | 0.84*   | 0.91*   | 0.90*   | 0.83*           | 1.00            | 0.75*           |
| Malic acid 2018 | 0.52*   | 0.62*   | 0.71*   | 0.55*           | 0.75*           | 1.00            |

\*Significant at p-value &lt; 0.0001

**Table S5.** Modeling of malic acid QTL increases explained variation for 2016 and 2018.

| Trait           |                                                     | QTL model | Model LOD | R <sup>2</sup> |
|-----------------|-----------------------------------------------------|-----------|-----------|----------------|
| Malic acid 2013 | 6@11920562                                          |           | 4.54      | 28.23          |
| Malic acid 2016 | 1@6289520+6@7855019+8@10993976+1@6289520×8@10993976 |           | 13.66     | 59.83          |
| Malic acid 2018 | 1@20356240+6@5589380+8@10343142                     |           | 10.59     | 53.33          |

R<sup>2</sup>, malic acid variation explained by the model; @, QTL peak position noted in bp relative to the *V. vinifera* 'PN40024' 12X V2 genome; × interaction.

**Table S6.** Growing degree days (GDD) from June through August in 2013, 2016, and 2018.

| Year | Month  | Monthly GDD | Cumulated GDD* |
|------|--------|-------------|----------------|
| 2013 | June   | 457         | 457            |
|      | July   | 629         | 1087           |
|      | August | 611         | 1698           |
| 2016 | June   | 609         | 609            |
|      | July   | 646         | 1256           |
|      | August | 606         | 1863           |
| 2018 | June   | 616         | 616            |
|      | July   | 637         | 1253           |
|      | August | 586         | 1840           |

\*GDD calculated with 50 °F as base temperature.

**Table S7.** Individual anthocyanin QTL

| Trait                            | Chromosome | LOD  | Peak position (Mb) | Physical position (Mb) at the 95% Bayesian interval |
|----------------------------------|------------|------|--------------------|-----------------------------------------------------|
| Cyanidin 3-glucoside 2013        | 2          | 7.1  | 7.99               | 6.97:17.01                                          |
| Malvidin 3-glucoside 2013        | 2          | 10.3 | 13.54              | 8.75:17.35                                          |
| Malvidin 3-glucoside 2018        | 2          | 4.4  | 5.35               | 1.63:17.35                                          |
| Peonidin 3-glucoside 2018        | 2          | 3.6  | 5.35               | 1.63:9.13                                           |
| Petunidin 3-glucoside 2013       | 2          | 12.5 | 13.54              | 8.08:16.74                                          |
| Petunidin 3-glucoside 2018       | 2          | 4.6  | 5.35               | 2.79:17.01                                          |
| Cyanidin 3-glucoside 2018        | 9          | 3.5  | 6.52               | 3.74:9.57                                           |
| Delphinidin 3-glucoside 2013     | 9          | 4.8  | 6.19               | 4.80:6.99                                           |
| Peonidin 3-glucoside 2013        | 9          | 3.9  | 3.87               | 0.23:20.99                                          |
| Malvidin 3-glucoside 2018        | 18         | 3.3  | 0.98               | 0.23:5.17                                           |
| Delphinidin 3,5-diglucoside 2013 | 2          | 5.6  | 7.99               | 6.97:14.87                                          |
| Malvidin 3,5-diglucoside 2013    | 2          | 7.1  | 7.99               | 6.97:17.01                                          |
| Petunidin 3,5-diglucoside 2013   | 2          | 11.3 | 8.08               | 6.97:17.01                                          |
| Cyanidin 3,5-diglucoside 2013    | 9          | 4.8  | 6.19               | 4.80:6.99                                           |
| Cyanidin 3,5-diglucoside 2018    | 9          | 3.0  | 6.99               | 4.35:9.57                                           |
| Delphinidin 3,5-diglucoside 2013 | 9          | 5.0  | 6.19               | 4.80:6.99                                           |
| Malvidin 3,5-diglucoside 2013    | 9          | 3.3  | 6.19               | 0.23:6.99                                           |
| Malvidin 3,5-diglucoside 2018    | 9          | 3.5  | 6.52               | 3.74:9.57                                           |
| Peonidin 3,5-diglucoside 2013    | 9          | 4.8  | 6.19               | 4.80:6.99                                           |
| Peonidin 3,5-diglucoside 2018    | 9          | 3.0  | 6.52               | 3.74:13.40                                          |
| Petunidin 3,5-diglucoside 2013   | 9          | 3.4  | 6.52               | 0.89:7.34                                           |
| Petunidin 3,5-diglucoside 2018   | 9          | 3.4  | 6.52               | 3.47:7.53                                           |
| Cyanidin 3,5-diglucoside 2013    | 19         | 3.5  | 13.23              | 0.90:19.08                                          |

QTL significant at 1000 permutation alpha test of 0.05; Mb, physical position relative to *V. vinifera* 'PN40024' 12X V2 genome.

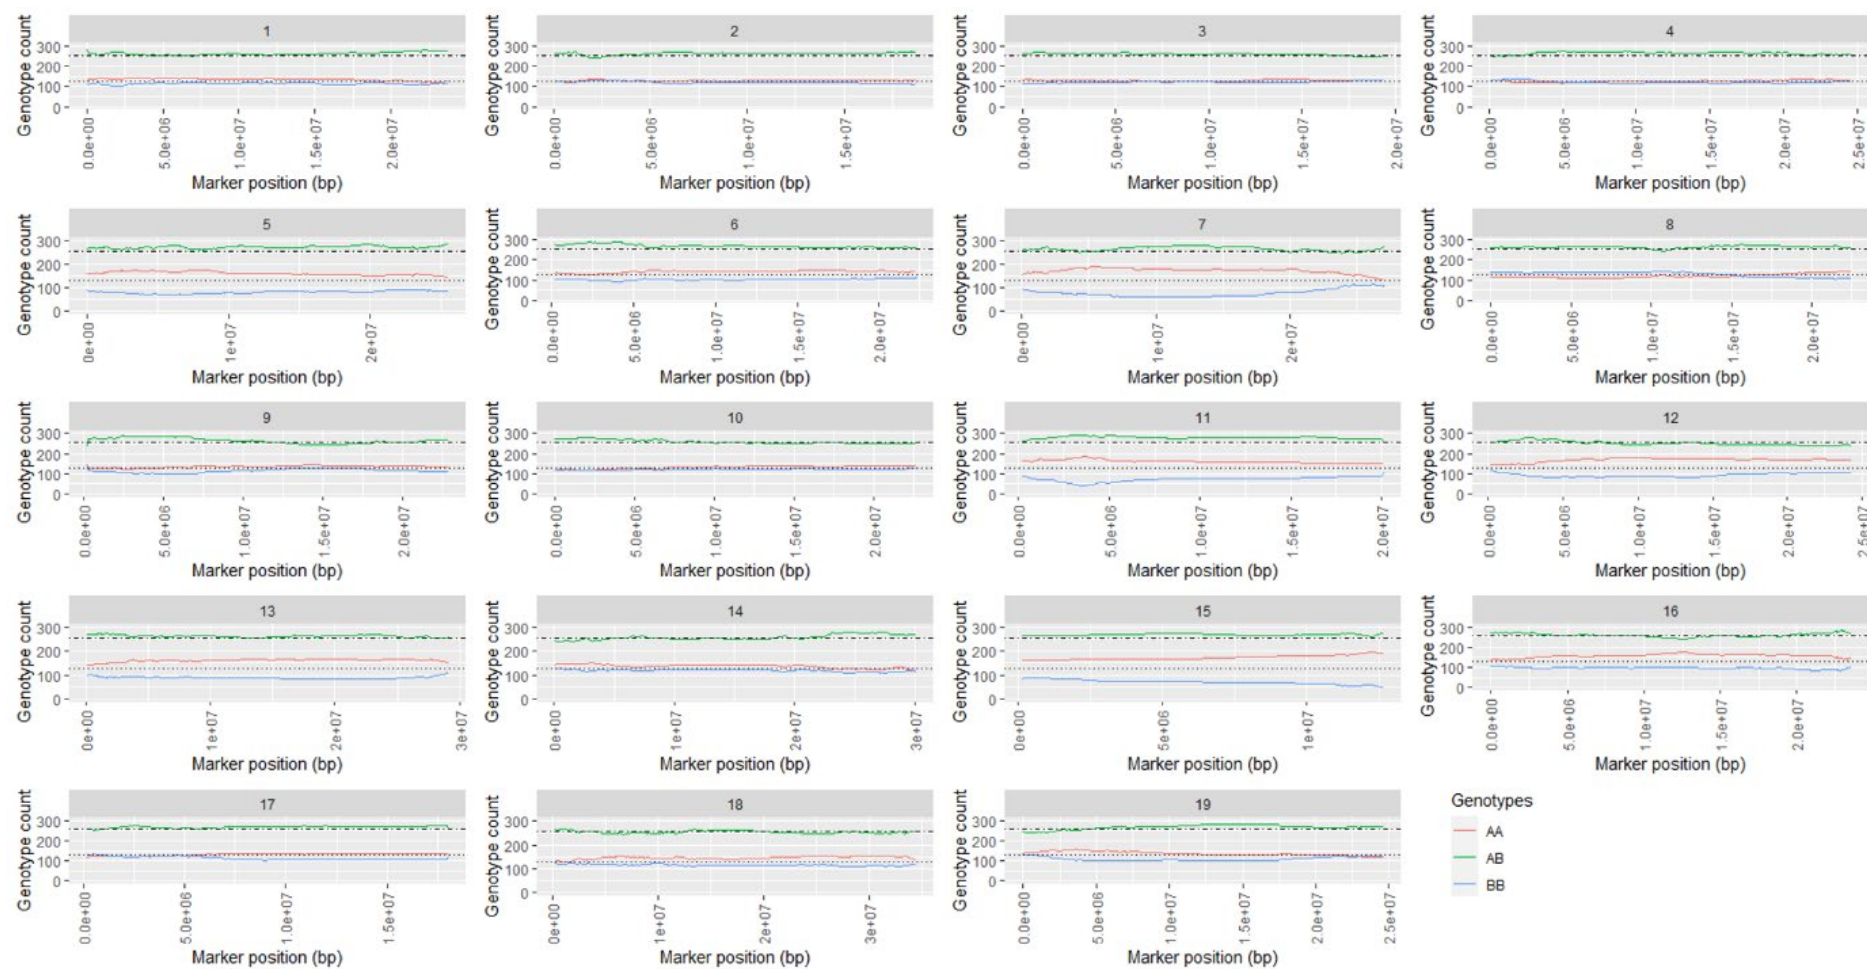

**Figure S1.** Genotype frequency plots for all markers in 19 chromosomes. Dotted and dotdash lines represent the expected genotype count 128 (for AA and BB) and 256 (for AB) under 1:2:1 Mendelian ratio



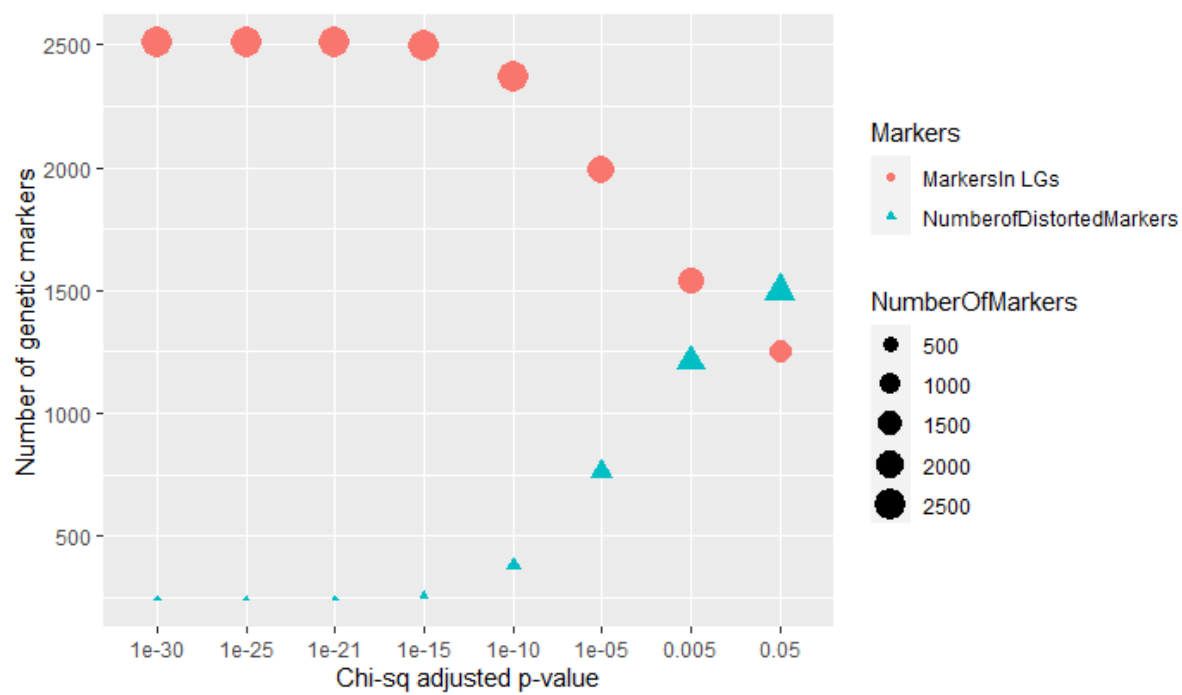

**Figure S2.** Number of genetic markers included with decreasing level of chi-square adjusted p-values.

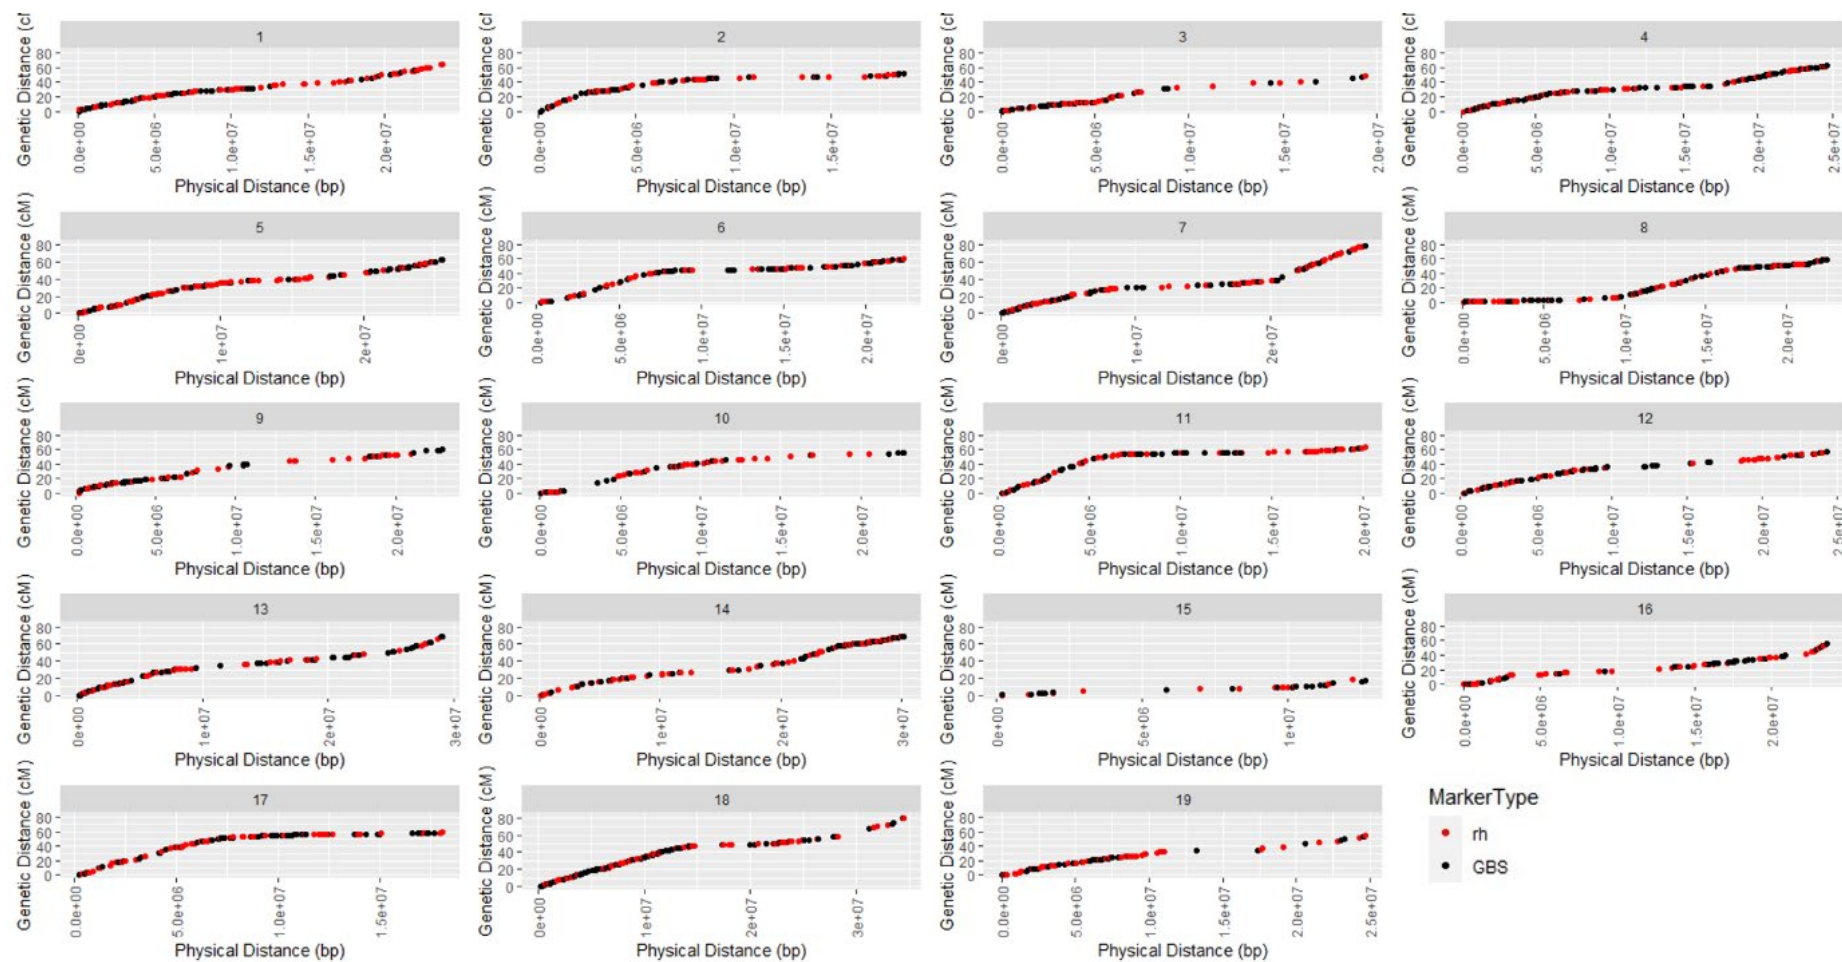

**Figure S3.** Collinearity between *V. vinifera* PN40024 V2 reference genome physical positions and genetic positions of the VRS-F<sub>2</sub> linkage map.

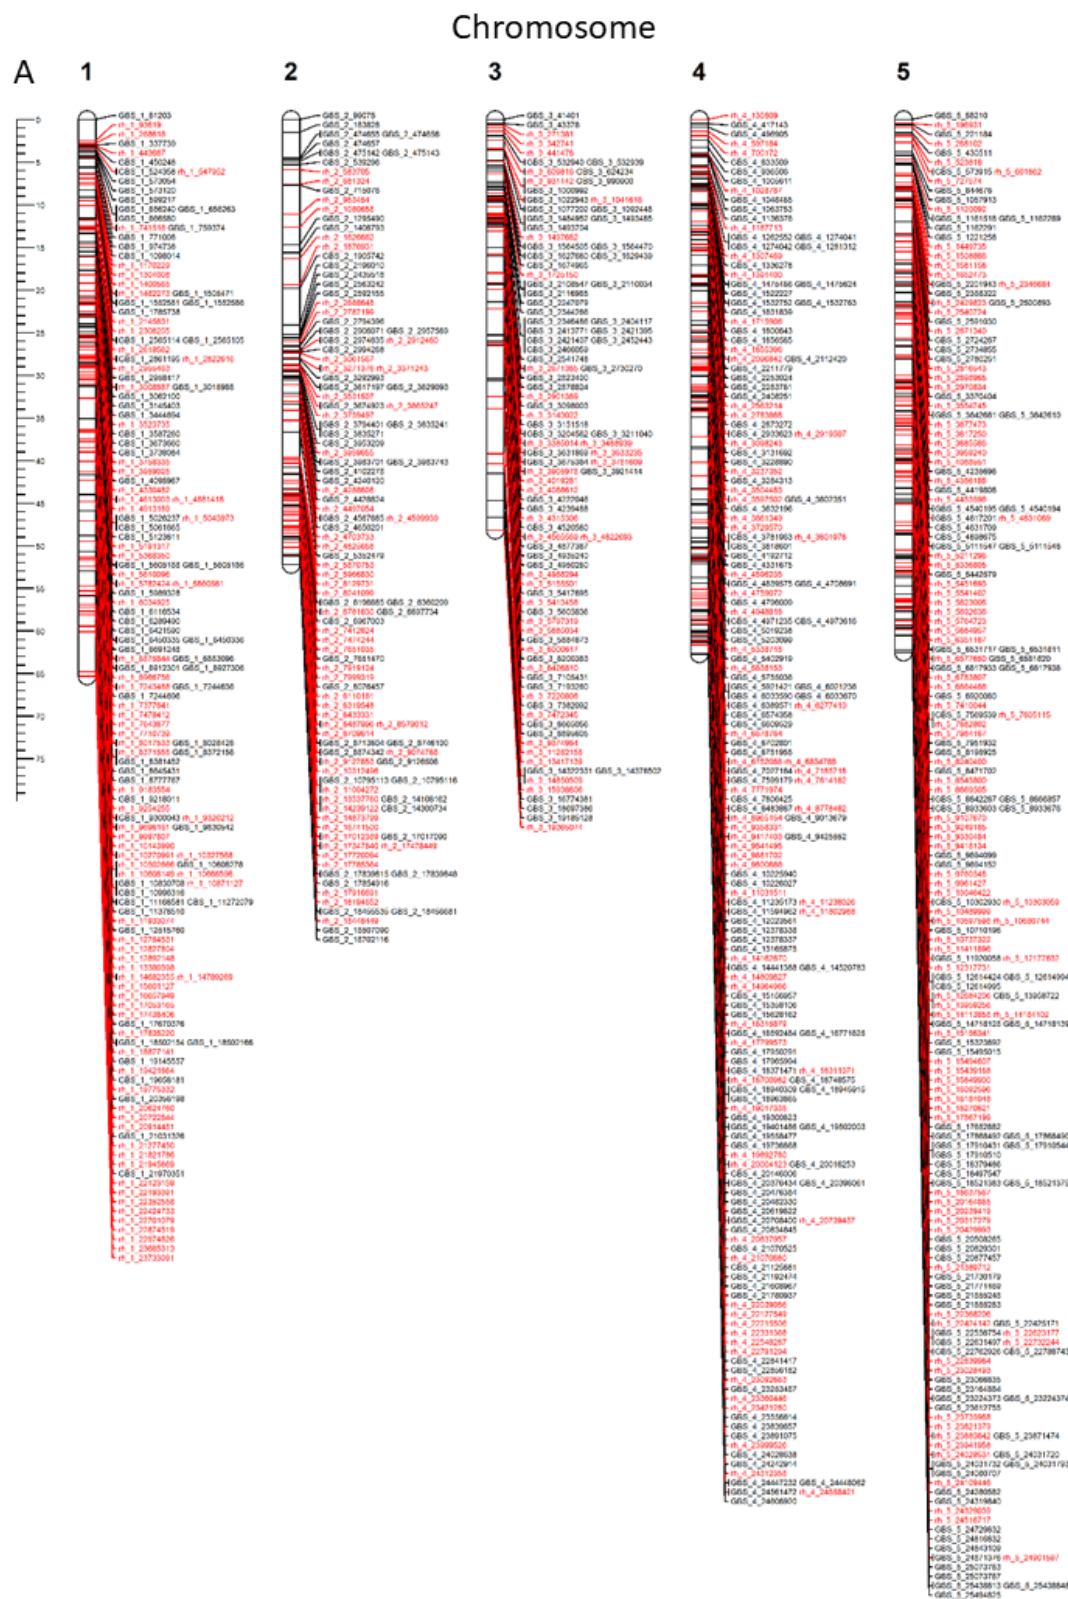

## Chromosome

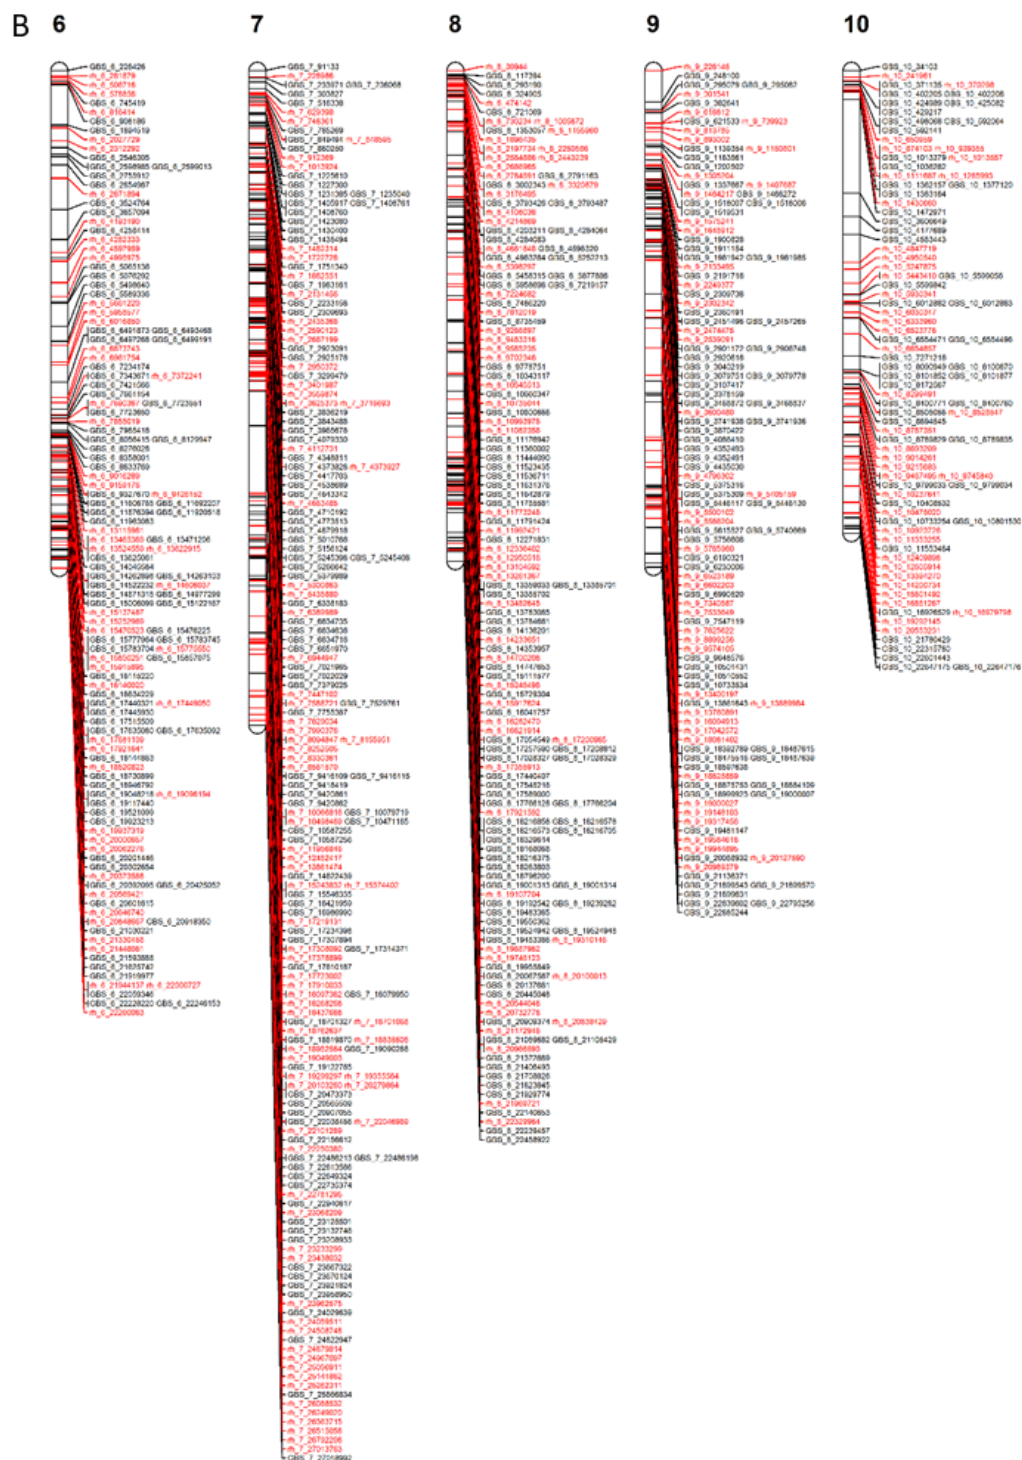



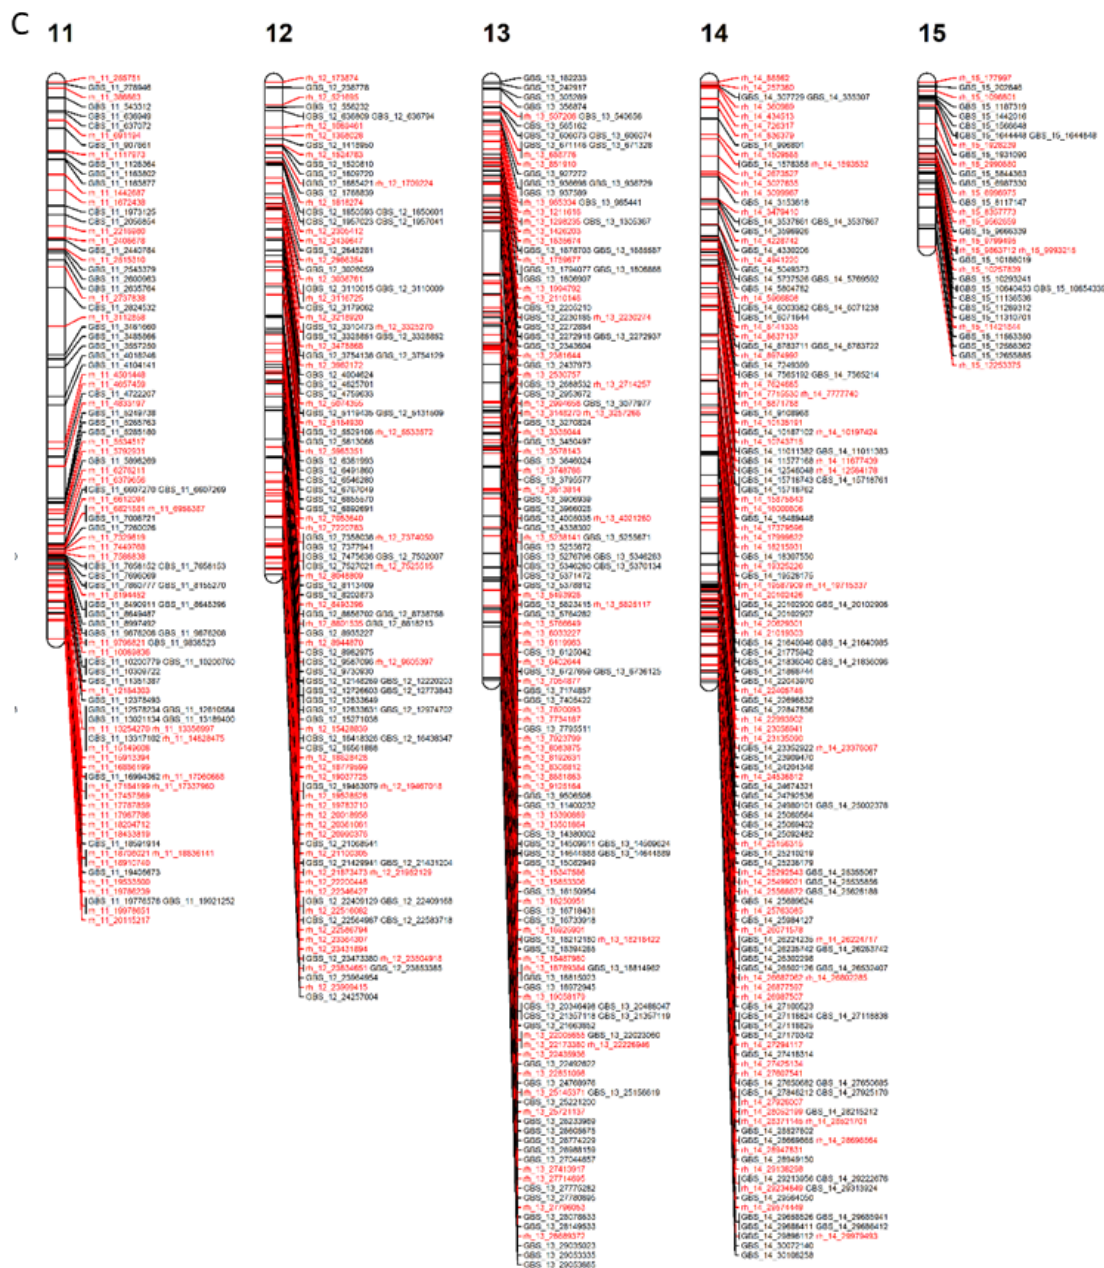

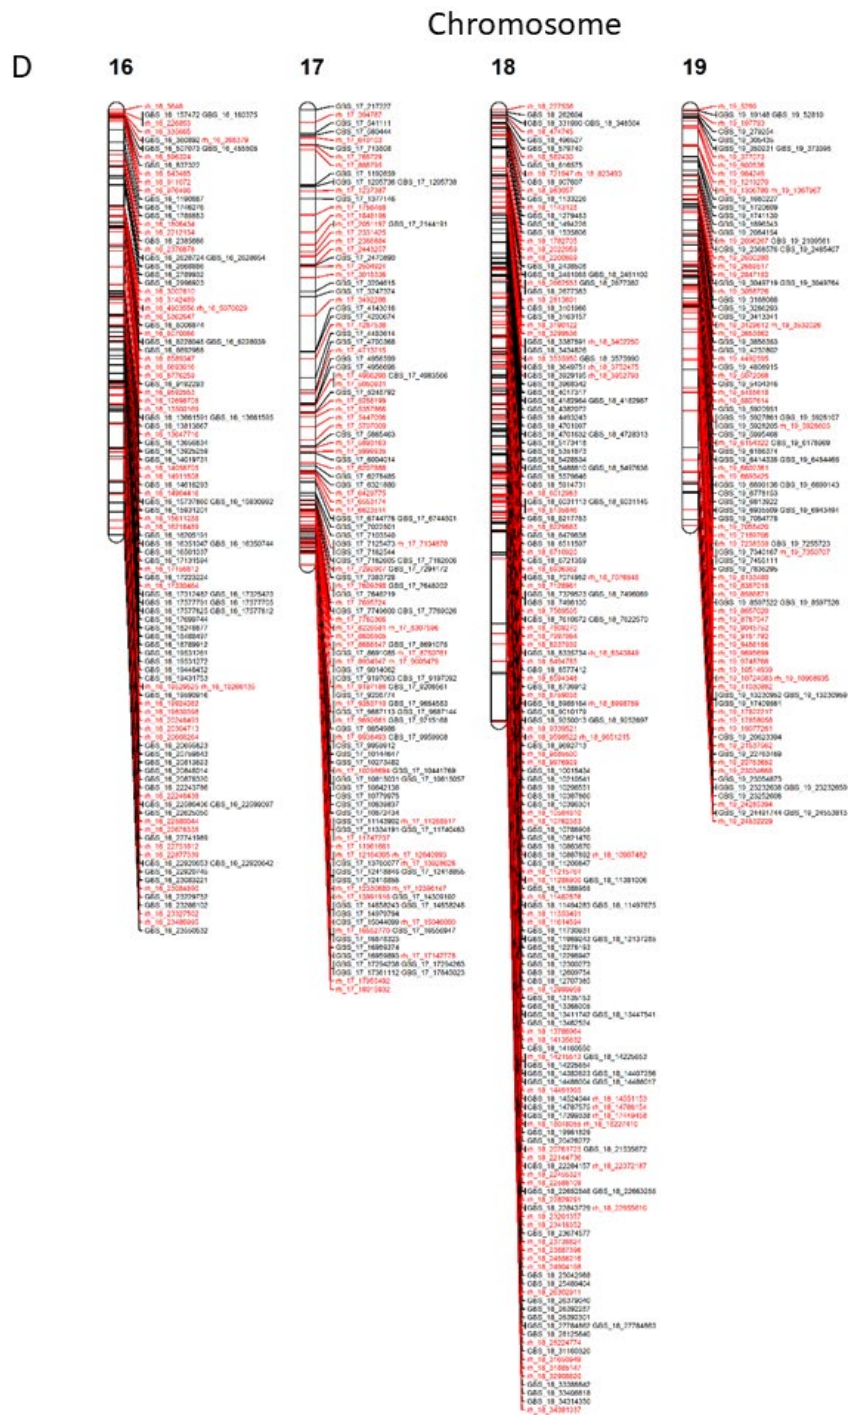

**Figure S4.** VRS-F<sub>2</sub> GBS-rhAmpSeq genetic map. Chromosome number is at the top and black and red colors indicate GBS and rhAmpSeq markers, respectively.

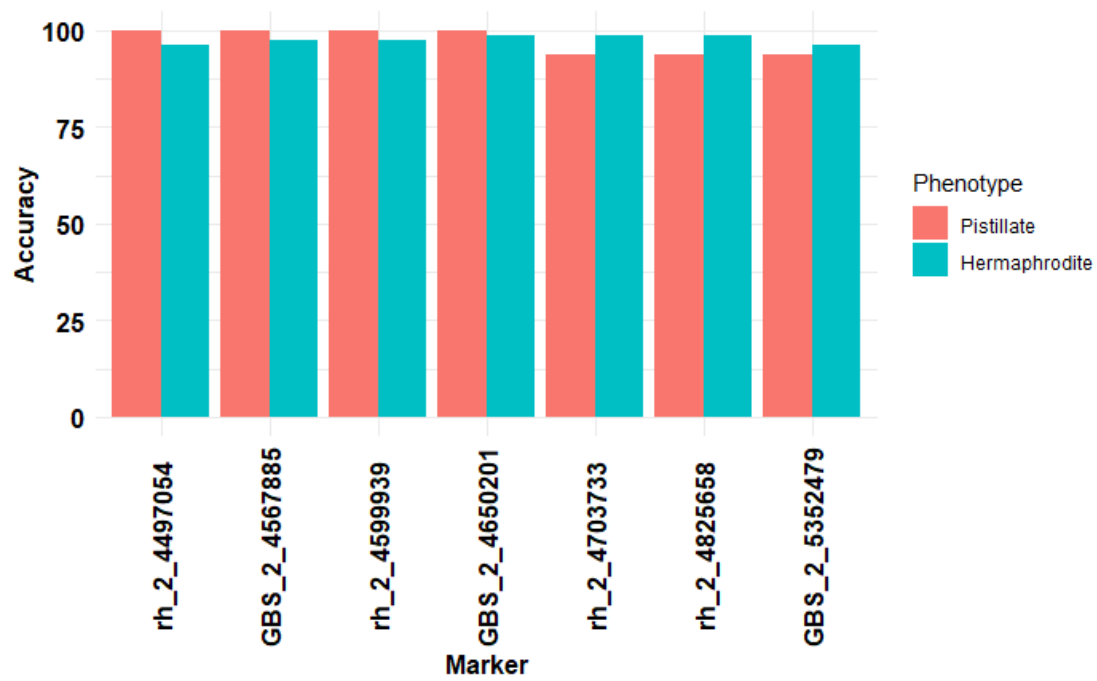

**Figure S5.** Genotype accuracy relative to flower phenotype in training set for potential flower type markers (n=97).

|                                |                                                                    |
|--------------------------------|--------------------------------------------------------------------|
| V.vinifera [Vitvi09g00582.t01] | MANPHPHFLIITFPAQGHINPALELAKRLIGVGADVTFATTIHAKSRLVKNPTVDGLRFS 60    |
| V.riparia [XP_034695482.1]     | MANPHPHFLIITFPAQGHINPALELAKRLIGVGADVTFATTIHAKSRLVKNPTVDGLRFS 60    |
| V.amurensis [AHL68667.1]       | MANPHPHFLIITFPAQGHINPALELAKRLIGVGADVTFATTIHAKSRLVKNPTVDGLRFS 60    |
| V.rotundifolia [ALS55360.1]    | MANPHPHFLIITFPAQGHIPALELAKRLIGVGADVTFATTIHAKSRLVKNPTVDGLRFS 60     |
|                                | *****:*****                                                        |
| V.vinifera [Vitvi09g00582.t01] | TFSDGQEEGVKRGPNLDPVFQRLASENLSELIMASANEGRPISCLIYSIVIPGAELARS 120    |
| V.riparia [XP_034695482.1]     | TFSDGQEEGVKRGPNLDPVFQRLASENLSELIMASANEGRPISCLIYSILIPGAELARS 120    |
| V.amurensis [AHL68667.1]       | TFSDGQEEGVKRGPNLDPVFQRLASENLSELIMASANEGRPISCLIYSILIPGAELARS 120    |
| V.rotundifolia [ALS55360.1]    | TFSDGQEEGVKRGPNLDPVFQRLASENLSELIMASANEGRPISCLIYSILIPGAELARS 120    |
|                                | *****:*****:*****                                                  |
| V.vinifera [Vitvi09g00582.t01] | FNIPSAFLWIQPATVLDIYYYYFNGFGDLIRSKSSDPSFSIELPGLPSLSRQDLPSFFVG 180   |
| V.riparia [XP_034695482.1]     | FNIPSAFLWIQPATVLDIYYYYFNGFGDLIRSKSSDPSFSIELPGLPSLSRQDLPSFFVG 180   |
| V.amurensis [AHL68667.1]       | FNIPSAFLWIQPATVLDIYYYYFNGFGDLIRSKSSDPSFSIELPGLPSLSRQDLPSFFVG 180   |
| V.rotundifolia [ALS55360.1]    | FNIPSAFLWIQPATVLDIYYYYFNGFGDLIRSKSSDPSFSIELPGLPSLSRQDLPSFFVG 180   |
|                                | *****:*****                                                        |
| V.vinifera [Vitvi09g00582.t01] | SDQNQENHALAAAFQKHLEILEQEENPKALVNTFDALEPEALRAVEKCLKLTAVGPLVPSGF 240 |
| V.riparia [XP_034695482.1]     | SDQNQENHALAAAFQKHLEILEQEENPKVLVNTFDALEPEALRAVEKCLKLTAVGPLVPSGF 240 |
| V.amurensis [AHL68667.1]       | SDQNQENHALAAAFQKHLEILEQEENPKVLVNTFDALEPEALRAVEKCLKLTAVGPLVPSGF 240 |
| V.rotundifolia [ALS55360.1]    | SDQNQENHALAAAFQKHLEILEQEENPKVLVNTFDALEPEALRAVEKCLKLTAVGPLVPSGF 240 |
|                                | *****:*****                                                        |
| V.vinifera [Vitvi09g00582.t01] | SDGKDASDTPSGGDLSDGSRDYMELKSKPESTVVYVSFGSISMFSMQMEEIARGLLES 300     |
| V.riparia [XP_034695482.1]     | SDGKDASDTPSGGDLSDGSRDYMELKSKPESTVVYVSFGSISMFSMQMEEIARGLLES 300     |
| V.amurensis [AHL68667.1]       | SDGKDASDTPSGGDLSDGSRDYMELKSKPESTVVYVSFGSISMFSMQMEEIARGLLES 300     |
| V.rotundifolia [ALS55360.1]    | SDGKDASDTPSGGDLSDGSRDYMELKSKPESTVVYVSFGSISMFTMQMEEIARGLLES 300     |
|                                | *****:*****                                                        |
| V.vinifera [Vitvi09g00582.t01] | GRPFLWLIRAKENGEENKEEDKLSQCQEELEKQGMLIQWCSQMEVLSHPSLGCFCVTHCGWN 360 |
| V.riparia [XP_034695482.1]     | GRPFLWVIRAKENGEENKEEDKLSQCQEELEKQGMLIQWCSQMEVLSHPSLGCFCVTHCGWN 360 |
| V.amurensis [AHL68667.1]       | GRPFLWVIRAKENGEENKEEDKLSQCQEELEKQGMLIQWCSQMEVLSHPSLGCFCVTHCGWN 360 |
| V.rotundifolia [ALS55360.1]    | GRPFLWVIRAKENGEENKEEDKLSQCQEELEKQGMLIQWCSQMEVLSHPSLGCFCVTHCGWN 360 |
|                                | *****:*****                                                        |
| V.vinifera [Vitvi09g00582.t01] | SSIESLASGVPMIAFPQWADQGTNTKLIKDVWKTGVRLMVNEEEIVTSDELKR----- 413     |
| V.riparia [XP_034695482.1]     | SSIESLASGVPMIAFPQWADQGTNTKLIKDVWKTGVRLMVNEEEIVTSDELKRCLELVMG 420   |
| V.amurensis [AHL68667.1]       | SSIESLASGVPMIAFPQWADQGTNTKLIKDVWKTGVRLMVNEEEIVTSDELKRCLELVMG 420   |
| V.rotundifolia [ALS55360.1]    | SSIESLASGVPMIAFPQWADQGTNTKLIKDVWKTGVRLMVNEEEIVTSDELKRCLELVMG 420   |
|                                | *****:*                                                            |
| V.vinifera [Vitvi09g00582.t01] | ----- 413                                                          |
| V.riparia [XP_034695482.1]     | DGEKGQEMRKNNAKKWKILKEALKEGGSSHKNLKNFVDEVIQGY 464                   |
| V.amurensis [AHL68667.1]       | DGEKGQEMRKNNAKKWKILAKEALKEGGSSHKNLKNFVDEVIQGY 464                  |
| V.rotundifolia [ALS55360.1]    | DGEKGQEMRKNNAKKWKILAKEALKEGGSSHKNLKNFVDEVIQGY 464                  |

**Figure S6.** Protein alignment of *V. vinifera*, *V. riparia*, *V. amurensis*, and *V. rotundifolia* anthocyanin 5-O-glycosyltransferase. Gray highlights a 51 amino acid truncation in *V. vinifera* PN40024 12X V2, Vitivi09g000582. NCBI Accession numbers are identified in brackets following species name.



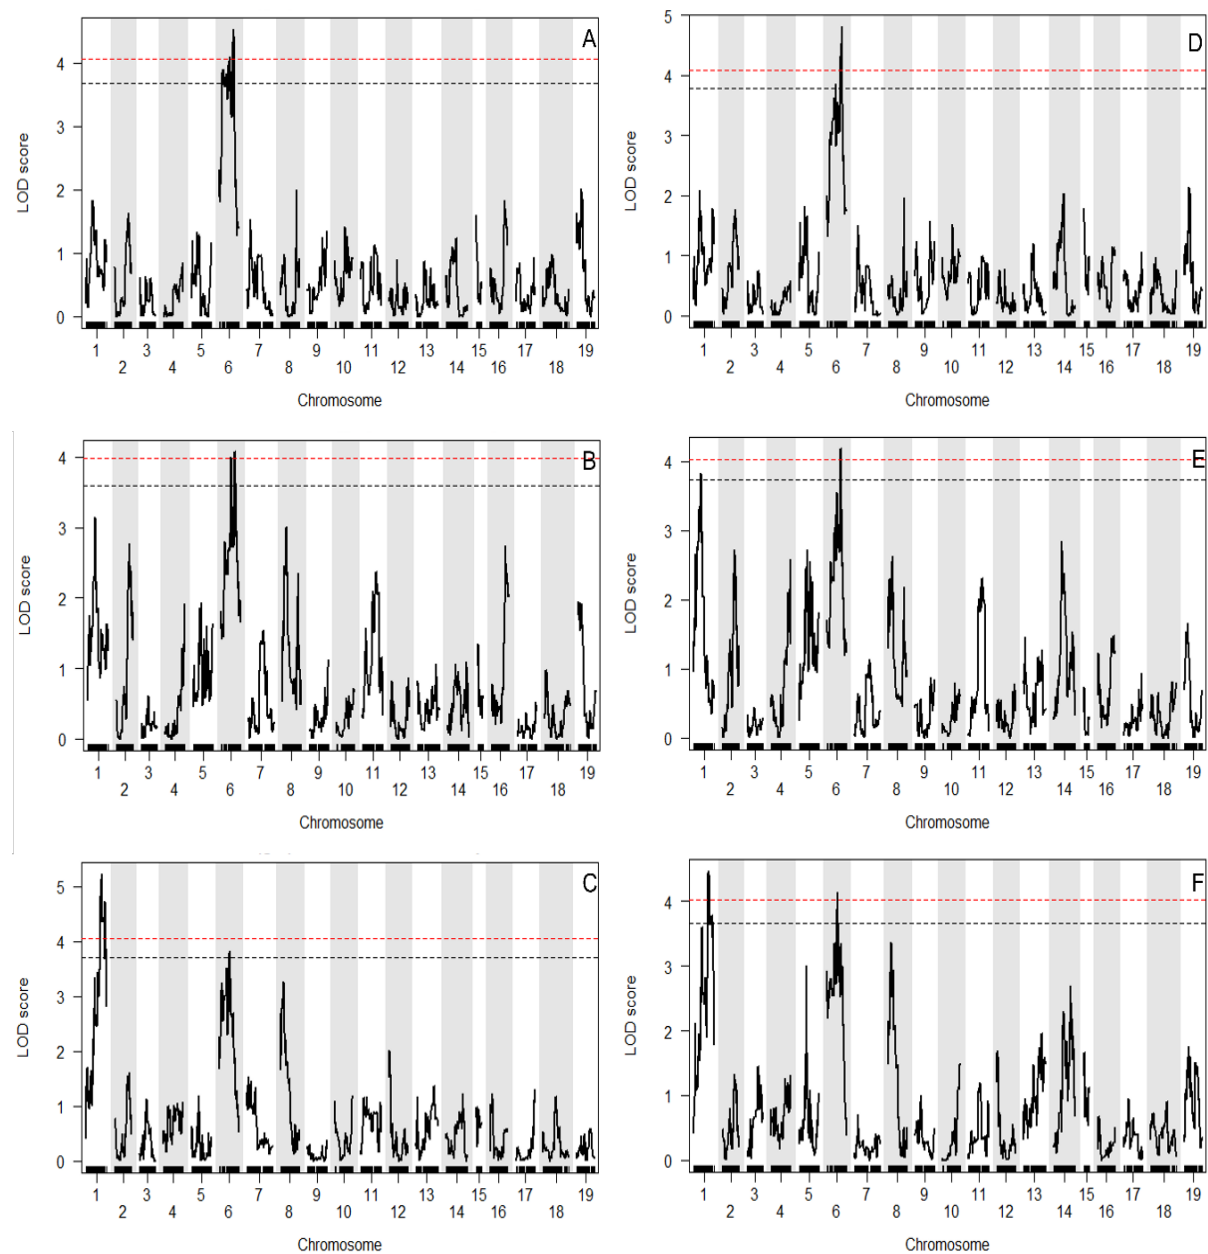

**Figure S7.** Genome-wide LOD score for malic acid (2013 (A), 2016 (B), and 2018 (C)) and titratable acidity (TA) (2013 (D), 2016 (E), and 2018 (F)). Black and red dashed horizontal lines represent 1000 permutation test at alpha of 0.1 and 0.05, respectively.
